# Supplementary material
Source: MDPI journal article supplement (https://www.mdpi.com/1996-1073/17/1/105)
Supplement: s1 [file s1 › energies-2715840-supplementary.pdf]

## **SUPPLEMENTARY MATERIAL**

# **Woodchips from Forest Residues as a Sustainable and Circular Biofuel for Electricity Production: Evidence from an Environmental Life Cycle Assessment**

**Flavio Scrucça \*, Grazia Barberio, Laura Cutaia and Caterina Rinaldi**

Department of Sustainability, ENEA—Italian National Agency for New Technologies, Energy and Sustainable Economic Development, Lungotevere Thaon Di Revel, 76, 00196 Rome, Italy

\* Correspondence: [flavio.scrucça@enea.it](mailto:flavio.scrucça@enea.it)

## Additional information on modelling, assumptions, and calculation

### UPSTREAM PHASE

Primary data regarding the forest operations were collected within the ARCADIA project activities, referring to a specific forest worksite dedicated to the production of class A woodchips as the main product of the process and class B woodchips as a by-product. Primary data regarding fossil fuels consumption in the machinery and related emissions were therefore directly collected as referred to the total volume of wood processed in this specific forest worksite. These data (Table 1) were then allocated on a volume basis to estimate the quantity of inputs (and related environmental loads) associated with the production of 1 ton class B woodchips. This allocation was based on primary data (available from the ARCADIA project) showing that branches, tops and residual parts represent the 8% in volume of the total wood intended for felling, a sawlogs-to-woodchips conversion factor equal to 2.75 m<sup>3</sup>/m<sup>3</sup> and a bulk density equal to 300 kg/m<sup>3</sup>. Then, the inputs to the system were calculated considering the woodchips required to generate 1 kWh electricity (0.8415 kg).

**Table S1.** Primary data collected within the ARCADIA project (referred to 1 m<sup>3</sup> wood processed).

| UPSTREAM                                           |                 |          |                      |
|----------------------------------------------------|-----------------|----------|----------------------|
| Forest machinery transportation                    | Diesel          | 1.66E-03 | kg                   |
| Felling                                            | Petrol          | 2.20E-02 | kg                   |
|                                                    | Lubricating oil | 7.52E-03 | kg                   |
| Extraction                                         | Diesel          | 1.04E-01 | kg                   |
| Delimbing and cutting                              | Petrol          | 6.89E-02 | kg                   |
|                                                    | Lubricating oil | 3.17E-03 | kg                   |
| Loading                                            | Diesel          | 1.30E+00 | kg                   |
| Chipping                                           | Diesel          | 1.02E+00 | kg                   |
| CO <sub>2</sub> emissions from forest worksite * - |                 | 7.42E+00 | kgCO <sub>2</sub> eq |

\* calculated based on the IPCC methodology [1] and the fuels consumption data

### CORE PHASE

Energy conversion process, including the other auxiliary operational inputs, fuel preparation processes at plant, maintenance activities and core waste management, was modelled through background data of the ecoinvent 3.9 database [2]. In particular, the ecoinvent dataset “Electricity,

*high voltage {IT} heat and power co-generation, wood chips, 6667 kW*", was used as the basis for the modelling.

According to this assumption, the CHP plant is considered as equipped with:

- A "heat and power co-generation unit, organic Rankine cycle, 1000 kW electrical", dimensioned to be connected to a biomass burning boiler with a capacity of 5000 kW<sub>th</sub> producing circa 1000 kW<sub>el</sub>. It has lifetime of 20 years and a lifetime capacity of 175,200,000 kWh;
- A "furnace, wood chips, with silo, 5000 kW", i.e. a wood chips furnace including a silo used for district heating networks, with a capacity of 5000 kW, a lifetime capacity of 876,000,000 kWh and a lifetime of 20 years;
- an electrostatic precipitator for particulate matter (PM) emission reduction, i.e. a dust collector, for industrial use with an air flow capacity of 1100 litres per second and a lifetime of 20 years.

All these processes include the materials used for the fabrication of the unit, energy required for the construction and the decommission of the unit. The amount associated to 1 kWh of net electricity generated are, therefore, the secondary data from the used ecoinvent dataset.

The Lower Heating Value (LHV) of the used woodchips was considered equal to 18.9 MJ/kg (dry mass). The literature report quite a big scattering of values for this parameter, since it depends on different factors, such as the wood species, the moisture content of woodchips, etc. Anyway, the assumed value is in line with specific studies that determined that the moisture a calorific value from 18.4 to 19.6 MJ/kg [3] and also with previous similar LCA [LCA4], that adopted exactly the same value (lower heating value on dry mass is 18.9 MJ/kg)

#### INPUT AND OUTPUT FLOWS OF THE SYSTEM

The fuel input to the system was 0.8415 kg woodchips with a Lower Heating Value (LHV) equal to 18.9 MJ/kg (dry mass). Consequently, the energy input was equal to 15.9 MJ. Moreover, an output of 0.144 kWh electricity per MJ heat produced was assumed, according to the ecoinvent dataset and based on expert judgement and on the share of heat from wood on the market for heat, district or industrial, other than natural gas. The overall electrical efficiency, calculated as the ratio of electric power output to the thermal power input to the system, was equal to 22.6%. This data is quite in line with market data for biomass-fired ORC cogeneration units declared by ORC manufacturers [4,5] and values presented in previous literature [6].

Mass and energy flows for the studied system are summarized in Figure S1.

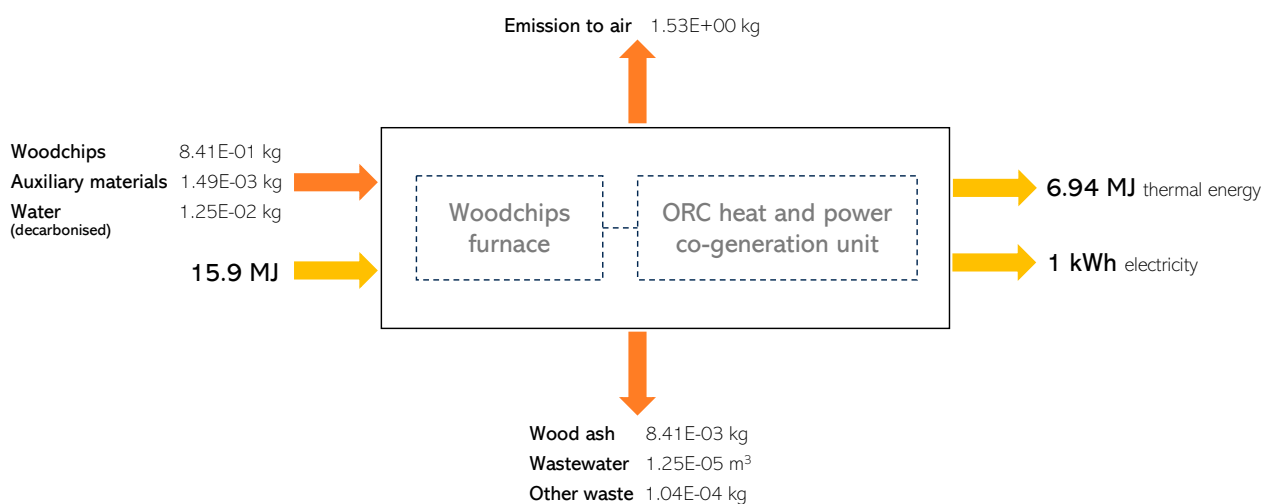

**Figure S1.** Mass and energy flows for the studied system.

## Additional results

**Table S2.** Carachterization—Case study.

| Impact category         | Unit                                   | Case study results |
|-------------------------|----------------------------------------|--------------------|
| Carcinogens             | kg C <sub>2</sub> H <sub>3</sub> Cl eq | 2,82E-03           |
| Non-carcinogens         | kg C <sub>2</sub> H <sub>3</sub> Cl eq | 3,33E-02           |
| Respiratory inorganics  | kg PM <sub>2.5</sub> eq                | 2,90E-04           |
| Ionizing radiation      | Bq C-14 eq                             | 3,71E-02           |
| Ozone layer depletion   | kg CFC-11 eq                           | 5,14E-10           |
| Respiratory organics    | kg C <sub>2</sub> H <sub>4</sub> eq    | 7,45E-05           |
| Aquatic ecotoxicity     | kg TEG water                           | 2,23E+01           |
| Terrestrial ecotoxicity | kg TEG soil                            | 4,36E+01           |
| Terrestrial acid/nutri  | kg SO <sub>2</sub> eq                  | 1,13E-02           |
| Land occupation         | m <sup>2</sup> org.arable              | 9,65E-04           |
| Aquatic acidification   | kg SO <sub>2</sub> eq                  | 1,50E-03           |
| Aquatic eutrophication  | kg PO <sub>4</sub> P-lim               | 1,14E-04           |
| Global warming          | kg CO <sub>2</sub> eq                  | 2,94E-02           |
| Non-renewable energy    | MJ primary                             | 4,28E-01           |
| Mineral extraction      | MJ surplus                             | 2,35E-04           |

**Table S3.** Carachterization—Sensitivity analysis.

| Impact category         | Unit                                   | Alternative scenario<br>(efficiency 27.8 %) |
|-------------------------|----------------------------------------|---------------------------------------------|
| Carcinogens             | kg C <sub>2</sub> H <sub>3</sub> Cl eq | 2.49E-03                                    |
| Non-carcinogens         | kg C <sub>2</sub> H <sub>3</sub> Cl eq | 2.73E-02                                    |
| Respiratory inorganics  | kg PM <sub>2.5</sub> eq                | 2.41E-04                                    |
| Ionizing radiation      | Bq C-14 eq                             | 4.59E-02                                    |
| Ozone layer depletion   | kg CFC-11 eq                           | 1.01E-08                                    |
| Respiratory organics    | kg C <sub>2</sub> H <sub>4</sub> eq    | 6.42E-05                                    |
| Aquatic ecotoxicity     | kg TEG water                           | 1.83E+01                                    |
| Terrestrial ecotoxicity | kg TEG soil                            | 3.55E+01                                    |
| Terrestrial acid/nutri  | kg SO <sub>2</sub> eq                  | 9.26E-03                                    |
| Land occupation         | m <sup>2</sup> org.arable              | 9.08E-04                                    |
| Aquatic acidification   | kg SO <sub>2</sub> eq                  | 1.23E-03                                    |
| Aquatic eutrophication  | kg PO <sub>4</sub> P-lim               | 9.38E-05                                    |
| Global warming          | kg CO <sub>2</sub> eq                  | 2.73E-02                                    |
| Non-renewable energy    | MJ primary                             | 3.91E-01                                    |
| Mineral extraction      | MJ surplus                             | 1.04E-03                                    |

## References

1. IPCC, 2006. Guidelines for National Greenhouse Gas Inventories. Volume 2 – Energy Available online: <https://www.ipcc-nggip.iges.or.jp/public/2006gl/vol2.html> (accessed on 28 August 2023).
2. Wernet, G.; Bauer, C.; Steubing, B.; Reinhard, J.; Moreno-Ruiz, E.; Weidema, B. The ecoinvent database version 3 (part I): Overview and methodology. *Int. J. Life Cycle Assess.* **2016**, *21*, 1218–1230. <https://doi.org/10.1007/s11367-016-1087-8>.
3. Pedišius, N.; Praspaliauskas, M.; Pedišius, J.; Dzenajavičienė, E.F. Analysis of Wood Chip Characteristics for Energy Production in Lithuania. *Energies* **2021**, *14*, 3931. <https://doi.org/10.3390/en14133931>
4. International Finance Corporation. 2017. Converting Biomass to Energy: A Guide for Developers and Investors. © Washington, DC. <http://hdl.handle.net/10986/28305> License: CC BY-NC-ND 3.0 IGO. Available online: <https://openknowledge.worldbank.org/entities/publication/8433d4c8-5ee3-5d0d-9b05-757d8195e367> (accessed on 7 September 2023).
5. <https://www.turboden.com/solutions/1051/biomass>
6. Algieri, A.; Morrone, P. Energy Analysis of Organic Rankine Cycles for biomass applications. *Thermal Science* **2015**, *19* (1), 193–205. <https://doi.org/10.2298/TSC120706030A>
